# Supplementary material
Source: publisher figshare collection journal article supplement (https://frontiersin.figshare.com/ndownloader/files/25506818)

Figure7A

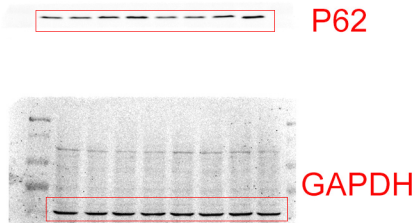

Figure7F

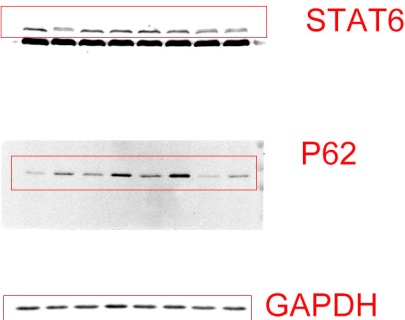

Figure7B

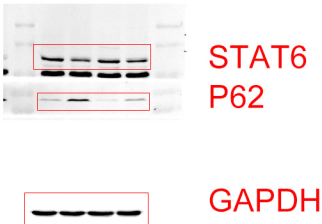

Figure7H

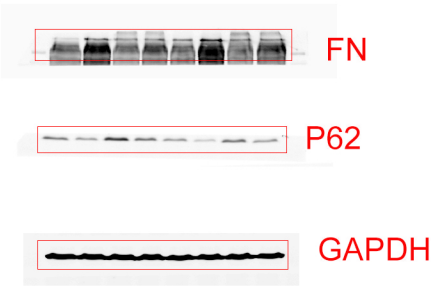

Figure7D

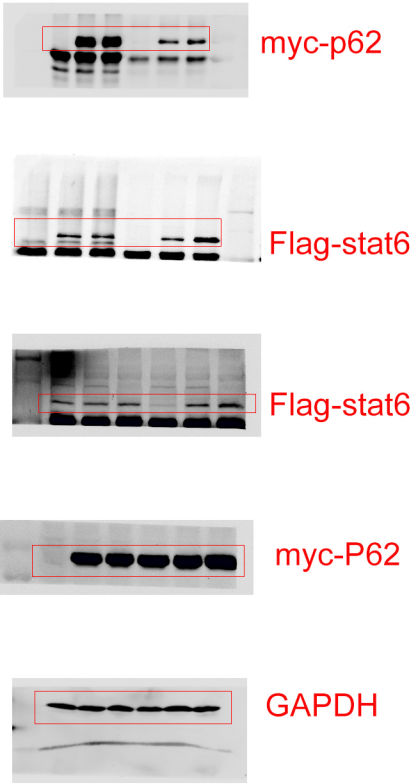

Supplement: Supplementary file [file 25506818]
